# Supplementary material for: Nitrogen-doped carbon nanotubes as an anode for a highly robust potassium-ion hybrid capacitor
Source: Royal Society of Chemistry journal article supplement (doi:10.1039/d0nh00451k), 2020-01-01
Supplement: d0nh00451k1.pdf [file d0nh00451k1.pdf]

## *Electronic Supplementary Information*

### **A Nitrogen-Doped Carbon Nanotubes as Anode for Highly Robust Potassium-Ion Hybrid Capacitor**

*Xiuqi Li,<sup>‡a</sup> Maoxin Chen,<sup>‡a</sup> Lei Wang,<sup>\*a</sup> Hanjiao Xu,<sup>a</sup> Jiang Zhong,<sup>a</sup> Meng Zhang,<sup>a</sup> Yaya Wang,<sup>a</sup> Qiusheng Zhang,<sup>a</sup> Lin Mei,<sup>\*a</sup> Tao Wang,<sup>\*a</sup> Jian Zhu,<sup>a</sup> Bingan Lu,<sup>b</sup> and Xidong Duan<sup>\*a</sup>*

*<sup>a</sup>State Key Laboratory for Chemo/Biosensing and Chemometrics, and College of Chemistry and Chemical Engineering, Hunan Key Laboratory of Two-Dimensional Materials, Hunan University, Changsha 410082, P. R. China*

*<sup>b</sup>School of Physics and Electronics, Hunan University, Changsha 410082, P. R. China.*

*\*Corresponding author, e-mail: [wangleihnu@hnu.edu.cn](mailto:wangleihnu@hnu.edu.cn) (L. Wang); [meilinhoo@yeah.net](mailto:meilinhoo@yeah.net) (L. Mei); [wangtao2014@hnu.edu.cn](mailto:wangtao2014@hnu.edu.cn) (T. Wang); [xidongduan@hnu.edu.cn](mailto:xidongduan@hnu.edu.cn) (X. Duan)*

*<sup>‡</sup>These authors contributed equally to this work.*

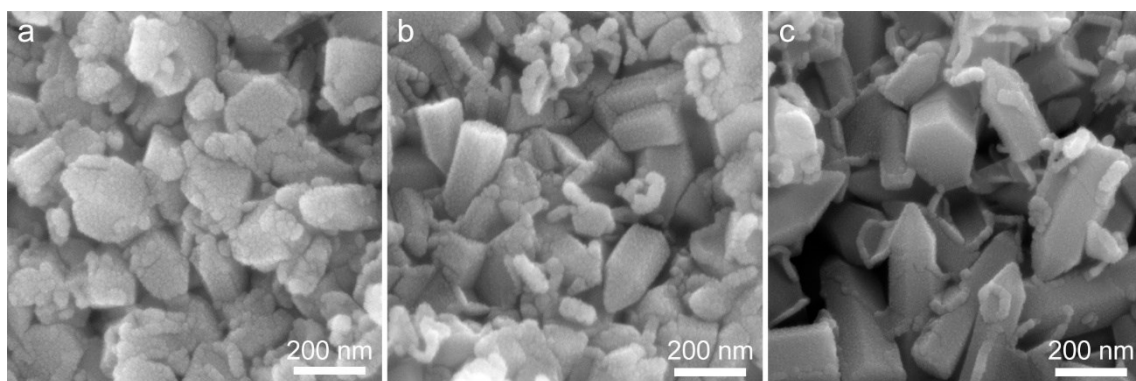

**Fig. S1.** SEM images of (a) CCNSs (0 g urea), (b) NCNTs (1 g urea) and (c) SNCNTs (3 g urea) taken before HCl washing.

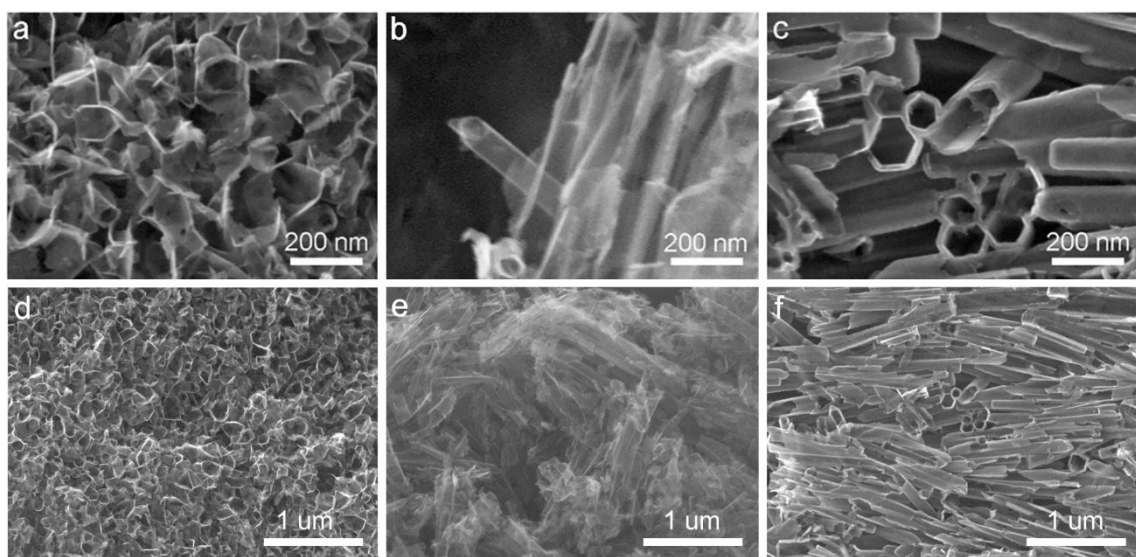

**Fig. S2.** High-magnification SEM images of (a) CCNSs (0 g urea), (b) NCNTs (1 g urea) and (c) SNCNTs (3 g urea) and low-magnification SEM images of (d) CCNSs (0 g urea), (e) NCNTs (1 g urea) and (f) SNCNTs (3 g urea).

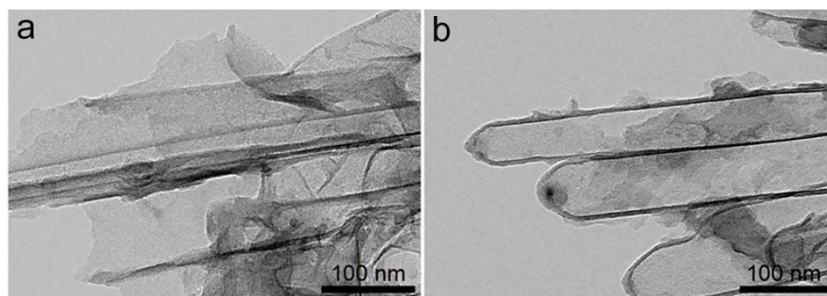

**Fig. S3.** TEM images of (a) CCNSs and (b) SNCNTs.

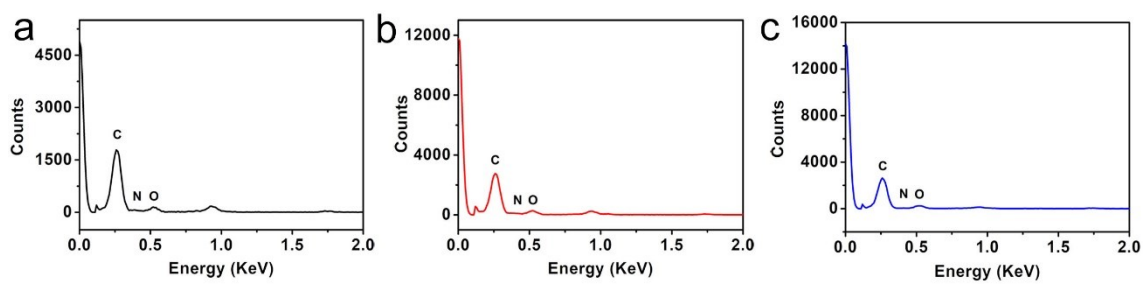

**Fig. S4.** EDS pattern of (a) CCNSs, (b) NCNTs and (c) SNCNTs.

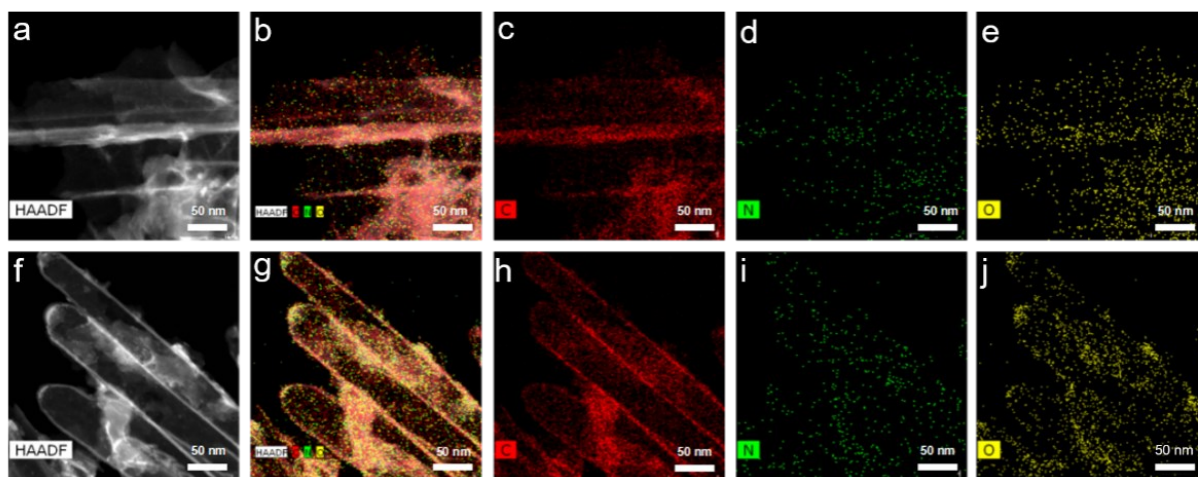

**Fig. S5.** Images of element mapping of (a-e) CCNSs and (f-j) SNCNTs.

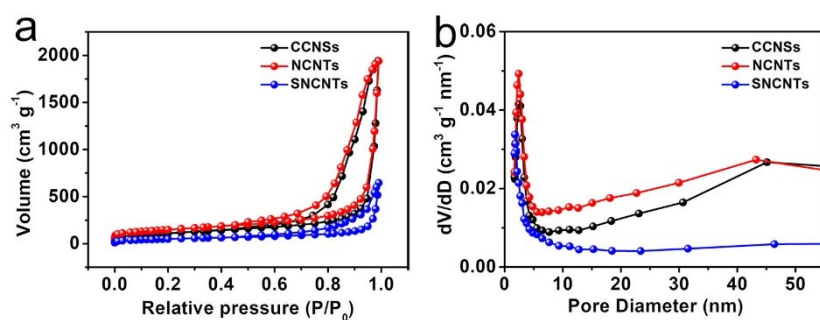

**Fig. S6.** (a) Nitrogen adsorption-desorption isotherms and (b) porous size distributions of CCNSs, NCNTs and SNCNTs.

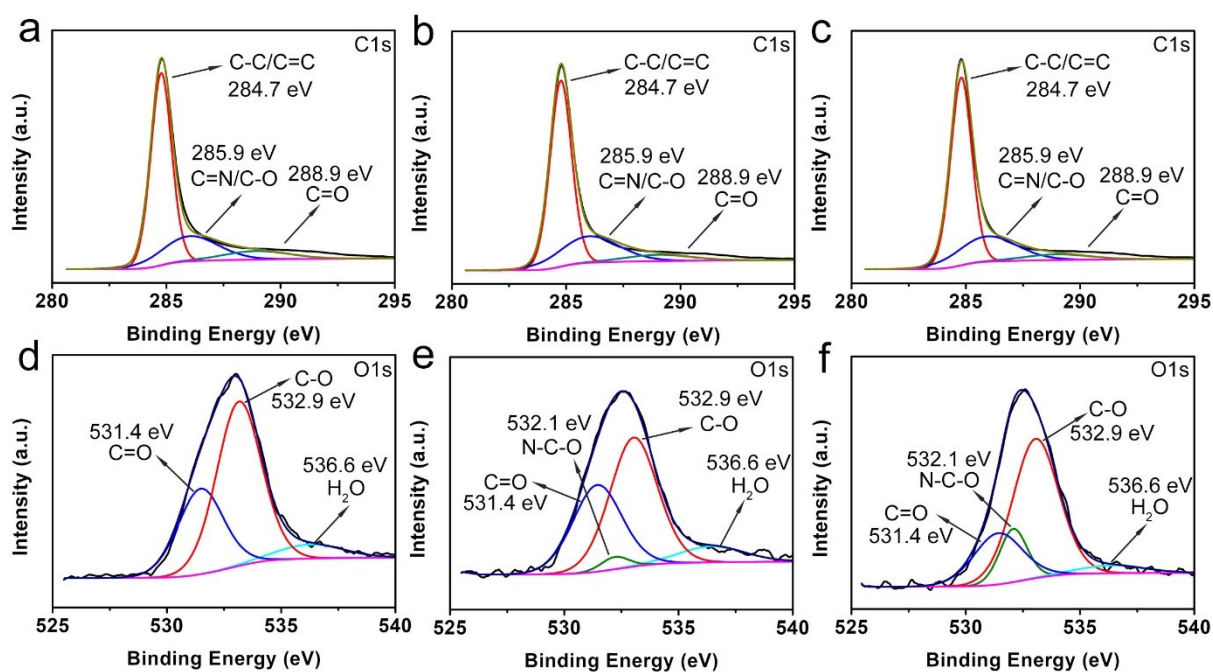

**Fig. S7.** (a-c) High resolution XPS C1s spectra of CCNSs, NCNTs and SNCNTs. (d-f) High resolution XPS O1s spectra of CCNSs, NCNTs and SNCNTs.

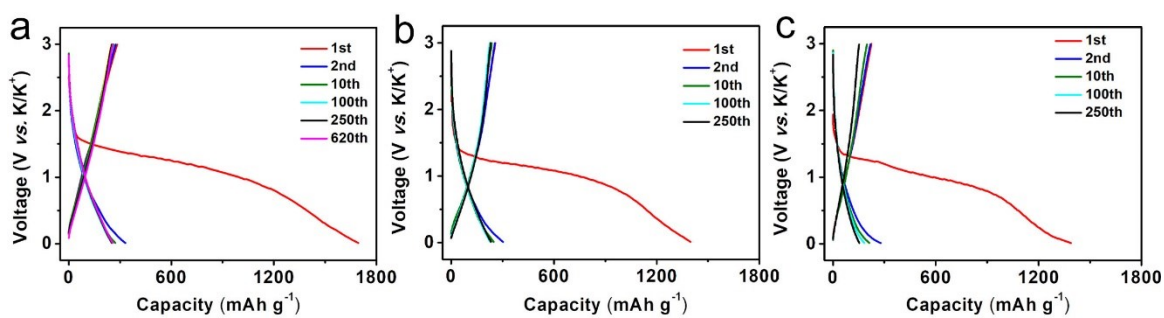

**Fig. S8.** Charge-discharge curves at a current density of  $100 \text{ mA g}^{-1}$  of (a) NCNTs, (b) CCNSs and (c) SNCNTs electrodes.

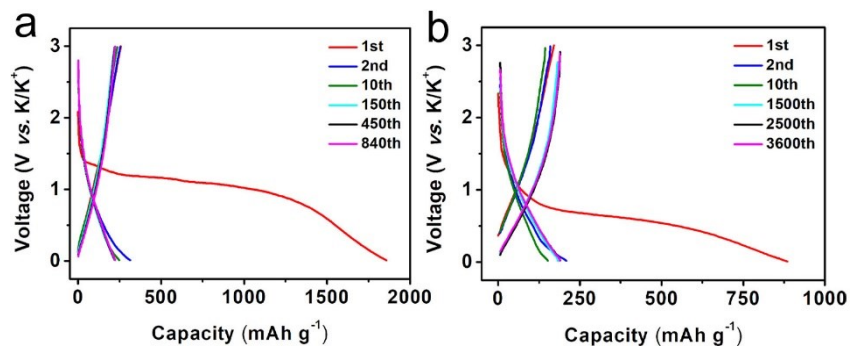

**Fig. S9.** Charge-discharge curves of NCNTs at current densities of (a)  $200 \text{ mA g}^{-1}$  and (b)  $1 \text{ A g}^{-1}$ , respectively.

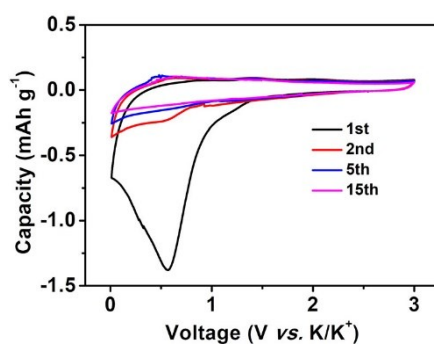

**Fig. S10.** The CV curves of the NCNTs after activated process collected at a scan rate of  $0.5 \text{ mV s}^{-1}$ .

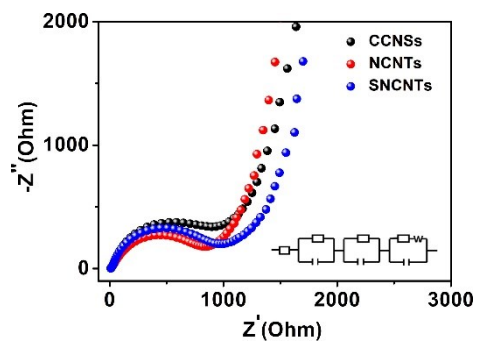

**Fig. S11.** Electrochemical impedance spectroscopy of CCNSs, NCNTs and SNCNTs.

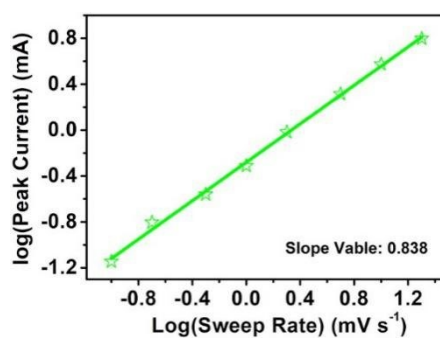

**Fig. S12.** The relationship between logarithm of peak current and scan rate during the depotassiation process.

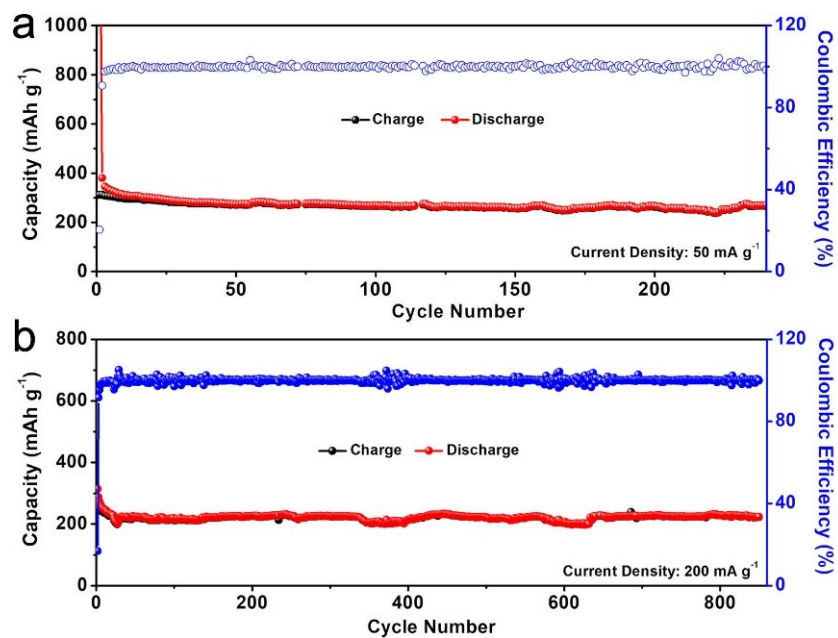

**Fig. S13.** Cycling performance of NCNTs at a current density of 50 and 200 mA g<sup>-1</sup>.

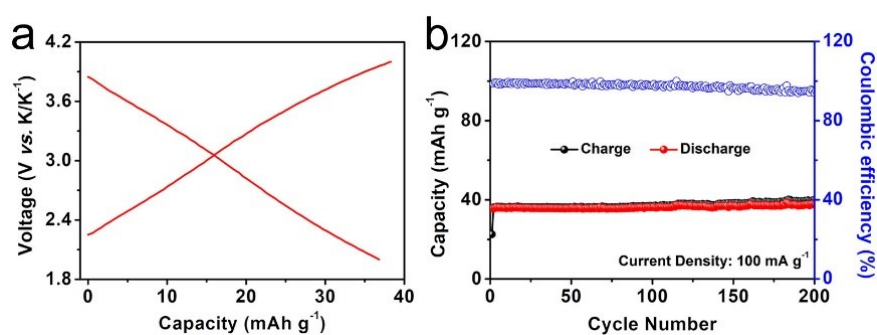

**Fig. S14.** (a) Charge-discharge profiles and (b) cycling performance of AC cathode at current density of 100 mA g<sup>-1</sup>.



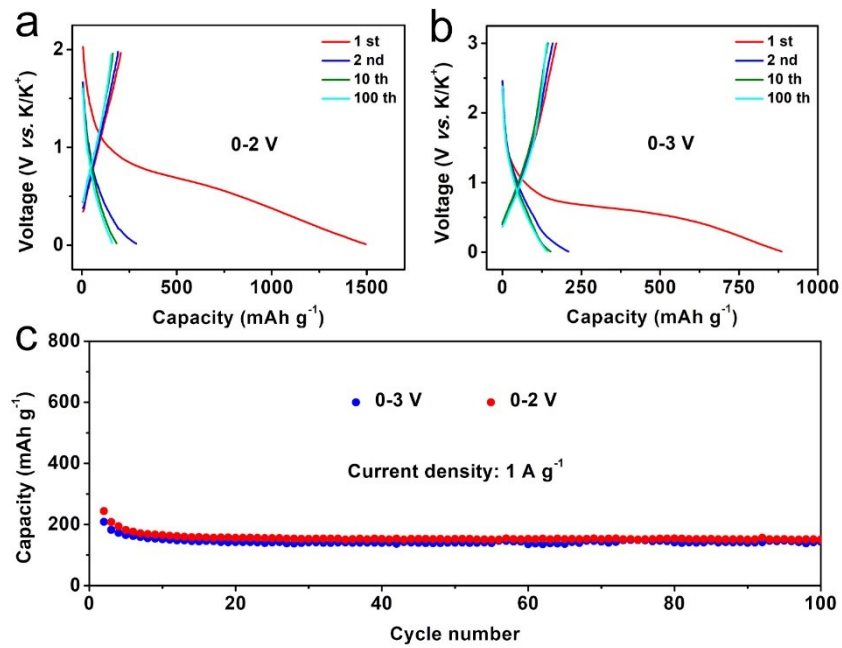

**Fig. S15.** Charge-discharge curves of NCNTs at voltage windows of (a) 0-2 V and (b) 0-3 V, respectively. (c) Cycling performance of NCNTs at voltage windows of 0-2 V and 0-3 V.

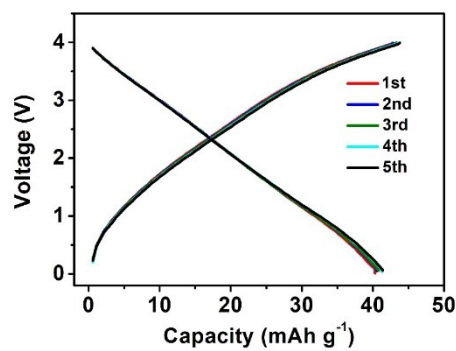

**Fig. S16.** The charge/discharge curves of the hybrid capacitor during the initial 5 cycles.

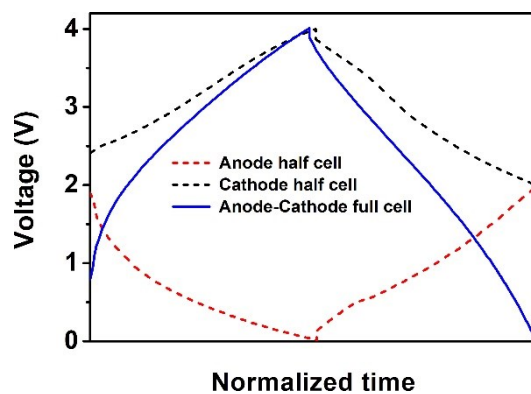

**Fig. S17.** The normalized voltage-time curves of the half cells and full cell.

**Table S1.** The element contents of CCNSs (0g), NCNTs (1g) and SNCNTs (3g) by elemental analysis.

| Name | CCNSs (PP At. %) | NCNTs (PP At. %) | SNCNTs (PP At. %) |
|------|------------------|------------------|-------------------|
| C1s  | 96.74            | 95.57            | 96                |
| O1s  | 3.26             | 3.22             | 2.46              |
| N1s  | 0                | 1.21             | 1.54              |

**Table S2.** Summary of potassium-ions storage performance of pure and nitrogen-doped carbon materials.

| Materials                      | Current density<br>(mA g <sup>-1</sup> ) | Cycle<br>number | Capacity<br>(mAh g <sup>-1</sup> ) | Capacity decay<br>(% per cycle) | Ref. |
|--------------------------------|------------------------------------------|-----------------|------------------------------------|---------------------------------|------|
| hollow carbon nanofiber        | 1000                                     | 1600            | 161.3                              | ~0.024                          | 1    |
| carbon nanosheet               | 170                                      | 300             | 136.3                              | ~0.158                          | 2    |
| walnut septum                  | 1000                                     | 1000            | 119.9                              | ~0.13                           | 3    |
| pure chitin                    | 2 C                                      | 500             | 105.6                              | ~0.02                           | 4    |
| carbon nanotubes               | 2000                                     | 500             | 102                                | ~0.044                          | 5    |
| porous carbon                  | 1000                                     | 1000            | 104.6                              | ~0.045                          | 6    |
| honeycomb-like carbon          | 1000                                     | 1000            | 270.4                              | ~0.033                          | 7    |
| carbon nanofibers              | 1000                                     | 2000            | 164                                | ~0.0136                         | 8    |
| amorphous carbon network       | 1000                                     | 4000            | 160                                | 0.008                           | 9    |
| soft carbon frameworks         | 1000                                     | 500             | 165                                | ~0.029                          | 10   |
| loofah-derived carbon          | 100                                      | 200             | 150                                | ~0.2                            | 11   |
| hierarchical carbon nanotubes  | 100                                      | 500             | 232                                | ~0.02                           | 12   |
| sub-20 nm carbon nanoparticles | 1000                                     | 4000            | 190                                | ~0.0034                         | 12   |
| hierarchical porous carbon     | 1000                                     | 1000            | 158                                | ~0.006                          | 13   |
| sub-micro carbon fiber         | 1 C                                      | 300             | 193                                | ~                               | 14   |
| mesoporous carbon              | 200                                      | 200             | 158                                | ~0.166                          | 15   |
| S/O co-doped hard carbon       | 0.72 C                                   | 200             | 180                                | ~0.166                          | 16   |
| polynanocrystalline graphite   | 0.36 C                                   | 300             | 60                                 | ~0.2                            | 17   |
| graphite                       | 0.5 C                                    | 50              | 100                                | ~0.985                          | 18   |
| soft carbon                    | 2 C                                      | 50              | 140                                | 0.372                           | 18   |
| hard carbon                    | 0.1 C                                    | 100             | 216                                | 0.17                            | 19   |
| graphite                       | 200                                      | 100             | 100.3                              | ~0.66                           | 20   |
| porous carbon                  | 10000                                    | 1000            | 185                                | ~0.062                          | 21   |
| biomass porous carbon          | 500                                      | 400             | 196                                | 0.0312                          | 22   |
| hard carbon                    | 200                                      | 150             | 210                                | 0.053                           | 23   |
| hard-soft composite carbon     | 1 C                                      | 200             | 180                                | 0.035                           | 24   |
| graphite                       | 100                                      | 100             | 210                                | 0.035                           | 25   |
|                                | 50                                       | 280             | 267.9                              | 0.0105                          |      |
| NCNTs                          | 100                                      | 620             | 257.5                              | 0.0358                          | This |
|                                | 200                                      | 850             | 223.2                              | 0.0338                          | work |
|                                | 1000                                     | 3600            | 190.2                              | 0.00238                         |      |

(Note: the decay rate is calculated from the second cycle)

## References

1. W. Yang, J. Zhou, S. Wang, W. Zhang, Z. Wang, F. Lv, K. Wang, Q. Sun and S. Guo, *Energy Environ. Sci.*, 2019, **12**, 1605-1612.
2. M. Qian, M. Tang, J. Yang, W. Wei, M. Chen, J. Chen, J. Xu, Q. Liu and H. Wang, *J. Colloid Interface Sci.*, 2019, **551**, 177-183.
3. C. Gao, Q. Wang, S. Luo, Z. Wang, Y. Zhang, Y. Liu, A. Hao and R. Guo, *J. Power Sources*, 2019, **415**, 165-171.
4. R. Hao, H. Lan, C. Kuang, H. Wang and L. Guo, *Carbon*, 2018, **128**, 244-230.
5. P. Xiong, X. Zhao and Y. Xu, *ChemSusChem.*, 2018, **11**, 202-208.
6. Y. Sun, H. Xiao, H. Li, Y. He, Y. Zhang, Y. Hu, Z. Ju, Q. Zhuang and Y. Cui, *Chem. Eur. J.*, 2019, **25**, 7359-7365.
7. H. He, D. Huang, Y. Tang, Q. Wang, X. Ji, H. Wang, Z. Guo and W. Huang, *Nano Energy*, 2019, **57**, 728-736.
8. Y. Xu, C. Zhang, M. Zhou, Q. Fu, C. Zhao, M. Wu and Y. Lei, *Nat. Commun.*, 2019, **9**, 1720.
9. J. Ruan, Y. Zhao, S. Luo, T. Yuan, J. Yang, D. Sun and S. Zheng, *Energy Storage Mater.*, 2019, **23**, 46-54.
10. C. Liu, N. Xiao, H. Li, Q. Dong, Y. Wang, H. Li, S. Wang, X. Zhang and J. Qiu, *Chem. Eng. J.*, 2020, **382**, 121759.
11. Z. Wu, L. Wang, J. Huang, J. Zou, S. Chen, H. Cheng, C. Jiang, P. Gao and X. Niu, *Electrochim. Acta*, 2019, **306**, 466-453.
12. Y. Wang, Z. Wang, Y. Chen, H. Zhang, M. Yousaf, H. Wu, M. Zou, A. Cao and R. P. S. Han, *Adv. Mater.*, 2018, **30**, 1802074.
13. H. Li, Z. Cheng, Q. Zhang, A. Natan, Y. Yang, D. Cao and H. Zhu, *Nano Lett.*, 2018, **18**, 7407-7413.
14. C. Shen, K. Yuan, T. Tian, M. Bai, J. Wang, X. Li, K. Xie, Q. Fu and B. Wei, *ACS Appl. Mater. Inter.*, 2019, **11**, 5015-5021.
15. W. Wang, J. Zhou, Z. Wang, L. Zhao, P. Li, Y. Yang, C. Yang, H. Huang and S. Guo, *Adv. Energy Mater.*, 2017, **8**, 1701648.
16. M. Chen, W. Wang, X. Liang, S. Gong, J. Liu, Q. Wang, S. Guo and H. Yang, *Adv. Energy Mater.*, 2018, **8**, 1800171.
17. Z. Xing, Y. Qi, Z. Jian and X. Ji, *ACS Appl. Mater. Inter.*, 2017, **9**, 4343-4351.
18. Z. Jian, W. Luo and X. Ji, *J. Am. Chem. Soc.*, 2015, **137**, 11566-11569.
19. Z. Jian, Z. Xing, C. Bommier, Z. Li and X. Ji, *Adv. Energy Mater.*, 2016, **6**, 1501874.
20. Z. Tai, Q. Zhang, Y. Liu, H. Liu and S. Dou, *Carbon*, 2017, **123**, 54-61.
21. D. Li, X. Ren, Q. Ai, Q. Sun, L. Zhu, Y. Liu, Z. Liang, R. Peng, P. Si, J. Lou, J. Feng and L. Ci, *Adv. Energy Mater.*, 2018, **8**, 1802386.
22. W. Cao, E. Zhang, J. Wang, Z. Liu, J. Ge, X. Yu, H. Yang and B. Lu, *Electrochim. Acta*, 2019, **293**, 364-370.
23. X. He, J. Liao, Z. Tang, L. Xiao, X. Ding, Q. Hu, Z. Wen and C. Chen, *J. Power Sources*, 2018, **396**, 533-541.
24. Z. Jian, S. Hwang, Z. Li, A. S. Hernandez, X. Wang, Z. Xing, D. Su and X. Ji, *Adv. Funct. Mater.*, 2017, **27**, 1700324.
25. K. Share, A. P. Cohn, R. Carter, B. Rogers and C. L. Pint, *ACS Nano*, 2016, **10**, 9738-9744.
